# Supplementary material for: Proteolytic Activation of the Essential Parasitophorous Vacuole Cysteine Protease SERA6 Accompanies Malaria Parasite Egress from Its Host Erythrocyte
Source: PubMed Central journal article supplement — J Biol Chem. 2012 Sep 14;287(45):37949–63. doi: 10.1074/jbc.M112.400820 (PMC3488066; doi:10.1074/jbc.m112.400820), 2012-09-14
Supplement: supp_M112.400820_jbc.M112.400820-1.pdf [file supp_M112.400820_jbc.M112.400820-1.pdf]

## SUPPLEMENTAL DATA

Proteolytic Activation of the Essential Parasitophorous Vacuole Cysteine Protease SERA6  
accompanies Malaria Parasite Egress from its Host Erythrocyte\*

**Andrea Ruecker<sup>1</sup>, Michael Shea<sup>1</sup>, Fiona Hackett, Catherine Suarez, Elizabeth M.A.  
Hirst, Katarina Milutinovic, Chrislaine Wither-Martinez, and Michael J. Blackman**

From the Division of Parasitology, MRC National Institute for Medical Research, Mill Hill,  
London NW7 1AA, UK

\* Running title: *SERA6 is a cysteine protease in the malarial PV*

<sup>1</sup>These authors contributed equally to this work.

To whom correspondence should be addressed: Michael J. Blackman, Division of  
Parasitology, MRC National Institute for Medical Research, The Ridgeway, Mill Hill, London  
NW7 1AA, UK, Tel.: +44 (0)208 816 2127; E-mail: [mblackm@nimr.mrc.ac.uk](mailto:mblackm@nimr.mrc.ac.uk)

**FIGURE S1.** ImmunoEM localization of SERA6 to the PV and PVM. Lower magnification (x6000) image of the schizont section view shown in the micrograph in Figure 2D of the main paper. Note association of gold particles with the PMV (small black arrows) as well as the space between merozoites, whilst in contrast the erythrocyte membrane (large black arrowheads) is virtually free of label.

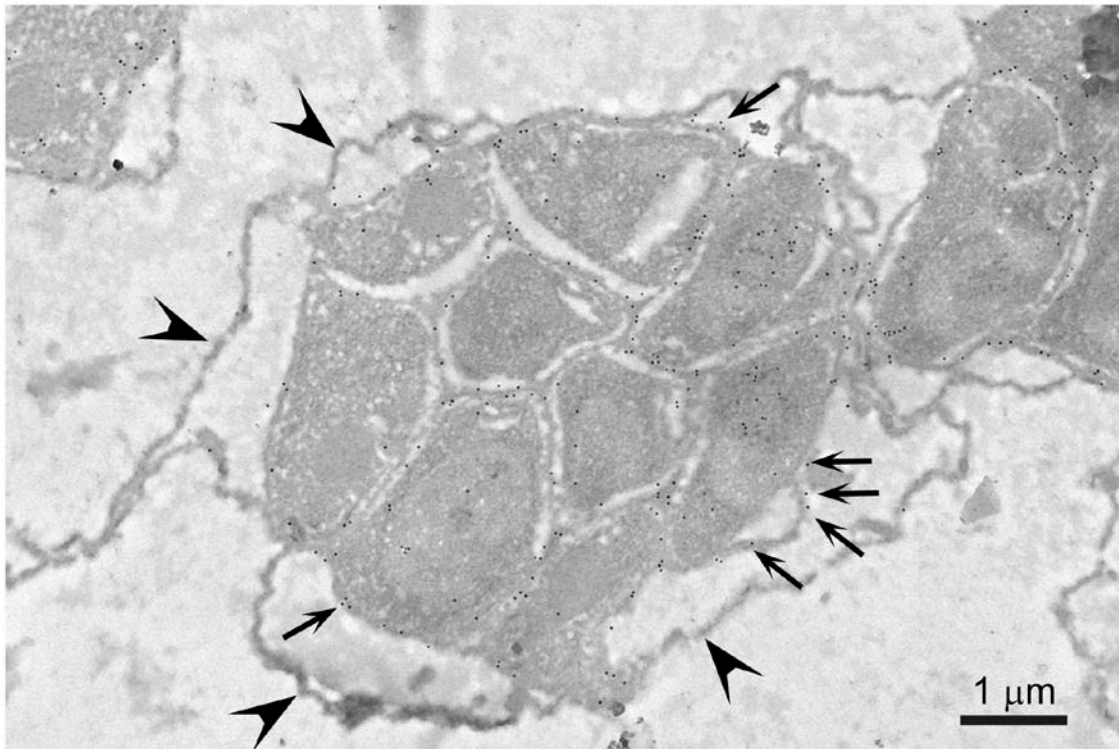

**FIGURE S2.** Recombinant expression and purification of PbSERA3. A recombinant form of full-length PbSERA3 (rPbSERA3), as well as a mutant in which the putative catalytic Cys641 residue is replaced by an Ala residue (rPbSERA3C641A) were expressed as secreted proteins in baculovirus-infected High Five™ cells in the presence of 0.5 µg/ml tunicamycin to prevent N-glycosylation of the recombinant protein. Culture supernatant (1200 ml) was clarified, adjusted to 50 mM Tris-HCl pH 8.2, applied to a HiPrep Q XL 16/10 ion exchange column (GE Healthcare, UK) and eluted with a 200 ml gradient of 0-400 mM NaCl in the same buffer, collecting 5 ml fractions. Peak fractions were pooled, concentrated, and applied to a Superdex 200 HR 10/30 column (GE Healthcare, UK), equilibrated in 25 mM HEPES pH 7.4, 150 mM NaCl, 12 mM CaCl<sub>2</sub>, collecting elution fractions of 0.4 ml. Shown are Western blot analyses of the indicated elution fractions, probed in all cases with an antibody reactive with the central papain-like domain of PbSERA3 (anti-PbS3C1). It can be seen that the elution profiles and yields of the two proteins were very similar.

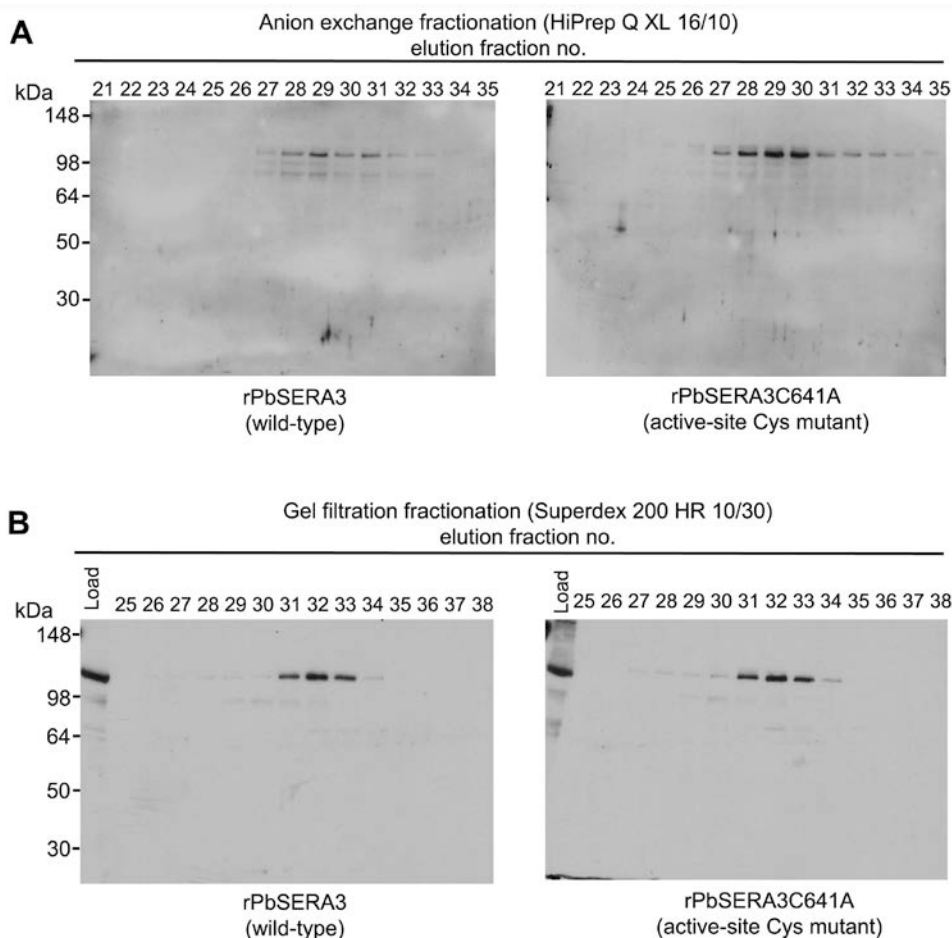

**FIGURE S3.** PfSUB1 correctly cleaves synthetic peptides based on the two predicted PbSUB1 cleavage sites in PbSERA3. A. Alignment of the predicted *P. falciparum* FCBR SERA6 sequence (GenBank M55428) with the PbSERA3 sequence (PlasmodDB ID PBANKA\_030490). Sequences were pairwise aligned using a fast/approximate CLUSTALW output tool from the Kyoto University Bioinformatics Center. The alignment was then analysed and modified using Jalview 2.7 (1,2) . Positions of identity are shaded in light blue. Gaps inserted to improve the alignment are shown as hyphens. The eight residues (P4-P4') flanking PfSUB1 cleavage sites in SERA6 (identified in this study) are shown in red, as are predicted site 1 and 2 cleavage sites in PbSERA3. The papain-like domain of both sequences (Ser606-Lys880 in SERA6) is indicated in dark blue, with predicted catalytic triad Cys, His and Asn residues in green. B. Progress curve showing cleavage of fluorogenic peptide substrate PbSERA3st1F-6R (0.1  $\mu$ M) by recombinant PfSUB1 (1.7 U/ml), as detected by a time-dependent increase in fluorescence. No cleavage occurred in the absence of PfSUB1 or with the additional presence of recombinant PD (85 nM). C. RP-HPLC fractionation of partially digested PbSERA3st1F-6R. Only two major new fluorescent peaks were produced. Their identities, as determined by electrospray mass spectrometry, are indicated. Cysteine side chains modified by 6-iodoacetamido tetramethylrhodamine (3) are shown (-R). D. RP-HPLC elution profiles of undigested and partially-digested peptide PbSERA3st2 (Ac-DVSGQSENHQ). Identities of major peaks determined by mass spectrometry (see Supplemental Table S2) are indicated. Note that the highly polar C-predicted terminal cleavage product (NH<sub>2</sub>-SENHQ-OH) was not observed, probably due to it not being retained by the column as found previously for other digestion products of PfSUB1 peptide substrates (4-6).

**A**

*PfSERA6* 1 ----M|CP|FFLY|I|NVLF|TQYF|KCE-----G|NKVTV|SHNNGHNDNLDV|NKNGV|SQENVF|DTS|ESLN|LPSNKK--V|G 69  
*PbSERA3* 1 MARLSS|VF|I|CLLL|CNNA|SDEV|ES|PSSSGT|LGGG|SGTDT|VTGT|QDGK|GKSE|GKNE|GGQT|DQK|GKEN|PEN|GQNSD|STG|DSSLG 87

*PfSERA6* 70 SDDLNTTT|SFTV|PDNLENEV|KVVSSSESG|GATV|SHTK|VTS|EGLSDT|QPNVT|QS-----VSS|SHTP|GSLD|STM|STE|QHS 145  
*PbSERA3* 88 STG|SNGSQ|PAPT|TPKE|PEPTT|PKPE|SATPK|ASE|PVT|PQK|TAET|ASG|KQV|SPT|PEN|PPSK|DTPK|PESSE|SEK|VNSAL|ATP|PAPE|V 174

*PfSERA6* 146 SVSQSS|LPTES|SETLN|KATV|E|P|I|Q|I|N-----SGL|LNK|NYNGV|KVTG|SCGSY|FRVY|LVPH|I|I|Y|ALTK|YSV|I|Q|LES|LFND|NAR|ID 226  
*PbSERA3* 175 KAQEGAG|LATQKE|QTPSK|RAKR|SPP|QVNN|I|TDM|ESY|LMK|NYD|G|VKV|I|GLCGV|YFRV|QF|SPH|LLY|GLT|TFS|I|I|Q|I|EPFF|EG-V|RID 260

*PfSERA6* 227 VE|HKGEL|QNK|CSE|GYHF|KLVVY|I|THNV|LN|L|KWK|TYK|P-----NEES|KSE|DSD|VR|KYR|I|PK|LER|P|F|T|S|I|QVY|T 293  
*PbSERA3* 261 FE|HQHP|I|RNK|CAPG|KAF|AF|I|SY|VKD|N|I|L|L|K|W|K|V|F|A|P|P|S|D|L|F|A|N|D|E|V|S|K|Q|I|L|S|A|V|S|V|T|S|D|A|E|S|S|V|D|V|R|K|Y|L|P|Q|L|D|R|P|F|T|S|I|QVY|K 347

*PfSERA6* 294 AN|SKAGV|I|ET|KNY|N|I|RTD|I|PDT|CDA|I|AT|DCF|LNG|NVN|I|EK|CF|QCT|LLV|QK|K|D|K|S|H|E|C|F|K|Y|V|S|S|E|M|K|K|M|N|E|I|K|V|K|A|Q|D|D|F|N|P|N|E|Y|K|L 380  
*PbSERA3* 348 AN|PKQGL|LET|KNY|I|L|KNA|I|PEK|GSK|I|SM|NCF|LNG|NVN|I|ENC|F|KCT|LLV|QNA|K|P|T|D|E|C|F|QY|L|P|S|D|M|K|N|N|L|N|E|I|K|V|T|A|Q|S|D|E|D|S|K|E|N|D|L 434

*PfSERA6* 381 I|E|S|D|N|I|L|S|K|I|Y|K|K|A|N|K|P|F|E|I|S|K|D|L|I|N|L|E|D|L|D|Y|Q|F|K|N|E|L|L|E|Y|C|K|L|L|K|K|V|D|T|S|G|T|L|E|E|Y|E|L|G|N|A|E|D|I|Y|N|N|L|R|L|L|K|S|H|S|D|E|N|I|V|T|L|Q|G 467  
*PbSERA3* 435 I|E|S|E|I|E|L|L|N|S|F|Y|K|A|D|K|K|K|L|S|-|L|I|T|M|D|D|F|D|D|V|L|R|A|E|L|F|N|Y|C|K|L|L|K|E|L|D|T|K|K|T|L|E|N|A|E|L|G|N|E|I|D|I|F|N|N|L|R|L|L|K|T|N|E|E|S|K|H|N|L|Y|K 519

*PfSERA6* 468 K|L|R|N|T|A|I|C|I|K|N|D|E|W|I|L|N|K|R|G|L|T|L|P|S|E|P|S|E|S|S|K|S|D|S|Y|L|N|T|F|N|D|K|D|K|N|E|D|K|D|M|S|K|N|S|K|E|E|F|K|N|D|D|K|E|N|S|D|Q|N|N|D|S|N|K|D|D|E|N|N 554  
*PbSERA3* 520 K|L|R|N|T|A|I|C|L|K|D|V|N|K|W|A|E|K|R|G|L|I|L|P|E|E|V|T-----Q|D|Q 551

*PfSERA6* 555 I|N|N|G|D|T|N|Y|V|D|F|D|D|D|D|D|N|N|S|Y|E|K|D|M|Y|E|S|P|I|K|E|N|K|N|G|V|I|D|L|E|K|Y|G|N|Q|I|K|L|K|S|P|Y|F|K|N|S|K|Y|C|N|Y|E|Y|C|N|R|W|A|R|D|K|T|S|C|I|S|Q|I|E|V|E|E|Q|G|N|C 641  
*PbSERA3* 552 M|A|I|G|Q|N|E|E|P|Y|D|E|D|P|D|R|V|D|L|L|E|L|F|D|D|N|Q|N|E|N|I|V|D|K|D|G|I|D|M|S|I|A|I|K|Y|A|K|L|K|S|P|Y|F|N|S|S|K|Y|C|N|Y|E|Y|C|D|R|A|Q|D|K|T|S|C|I|S|N|I|D|V|E|E|Q|G|N|C 638

*PfSERA6* 642 G|L|Q|W|I|F|A|S|K|L|H|F|E|I|R|C|M|R|G|Y|G|H|R|S|S|A|L|Y|A|N|C|S|K|R|K|P|I|D|R|C|E|E|G|S|N|P|L|E|F|L|R|I|L|D|E|K|K|F|L|P|L|E|S|N|P|Y|S|T|S|A|G|N|S|C|P|K|L|P|N|S|W|I 728  
*PbSERA3* 639 S|L|Q|W|L|F|A|S|K|L|H|L|E|T|I|R|C|M|R|G|Y|G|H|R|S|S|A|L|Y|A|N|C|S|K|R|T|A|E|E|I|C|N|D|G|S|N|P|L|E|F|L|K|I|L|E|K|N|K|F|L|P|L|E|S|N|P|Y|L|W|K|N|V|S|G|K|C|P|N|P|O|N|D|W|T 725

*PfSERA6* 729 N|L|W|G|D|T|K|L|L|F|N|K|K|V|H|R|Y|I|G|N|K|G|F|I|S|H|E|T|S|Y|F|K|N|N|D|L|F|I|D|M|V|K|R|E|V|Q|N|K|G|S|V|I|Y|I|K|T|Q|D|V|I|G|Y|D|F|N|G|K|G|V|H|M|C|G|D|R|T|P|D|H|A|A|N|I|I 815  
*PbSERA3* 726 N|L|W|G|N|T|K|L|L|Y|N|N|W|F|G|Q|F|I|K|H|R|G|Y|I|V|Y|S|R|F|F|A|K|N|N|V|F|I|D|I|K|R|E|I|R|N|K|G|S|V|I|A|Y|I|K|T|Q|G|V|I|D|Y|D|F|N|G|R|Y|I|S|N|I|C|G|H|N|H|P|D|H|A|V|N|I|I 812

*PfSERA6* 816 G|Y|G|N|Y|I|N|K|K|G|E|K|R|S|Y|W|L|I|R|N|S|W|S|Y|Y|W|G|D|E|G|N|F|R|V|D|M|L|G|P|K|N|C|L|Y|N|F|I|H|T|V|V|F|F|K|L|D|L|G|T|I|H|V|P|K|K|K|S|W|K|N|-----V|Y|F|L|R|H 892  
*PbSERA3* 813 G|Y|G|N|Y|I|S|E|S|G|E|K|R|S|Y|W|L|I|R|N|S|W|G|Y|Y|W|G|H|E|G|N|F|K|V|D|V|L|G|P|D|N|C|V|H|N|V|I|H|T|A|I|V|F|K|I|D|M|E|P|D|S|D|S|N|N|N|N|A|I|K|N|R|D|Q|L|I|D|E|D|N|K|S|Y|F|P|Q|L 899

*PfSERA6* 893 N|T|D|F|M|Y|S|L|Y|N|N|Y|E|P|-E|T|S|Q|D|F|E|S|E|N|D|Y|D|N|A|F|V|H|G|Q|S|D|E|S|D|E|T|N|K|E|G|K|N|V|H|N|-----D|E|T|N|K|E|G|K|N|V|H|N|----- 943  
*PbSERA3* 900 S|N|F|Y|H|S|L|Y|N|N|Y|E|G|Y|E|A|K|N|D|D|E|N|D|Q|N|Y|G|N|L|D|V|S|G|Q|S|E|N|H|Q|N|D|P|K|N|P|Q|P|Q|A|N|S|T|V|T|Q|L|G|V|C|P|A|E|N|Q|R|T|A|D|S|N|P|N|A|Q|S|T|P|S|P|N|T|V|T|D 986

*PfSERA6* 944 -----S|V|E|K|K|I|Q|I|L|H|I|L|K|H|I|K|D|S|Q|I|K|R|G|L|V|K|Y|D|N|I|N|E|T|K|D|E|H|T|C|S|R|V|N|S|Q|D|A|E|K|Y|E|E|C|K|F|C|L|T|K|W|N|E|C|K 1008  
*PbSERA3* 987 T|V|N|S|N|T|A|N|S|N|T|A|N|S|T|A|S|A|N|A|A|S|I|E|K|K|I|Q|I|L|H|V|L|K|H|I|E|K|Y|K|M|T|R|G|F|V|K|Y|D|N|L|N|D|T|K|N|D|Y|T|C|A|R|S|Y|S|Y|D|P|K|N|H|N|E|C|K|Q|F|C|E|E|N|W|E|R|C|K 1073

*PfSERA6* 1009 D|H|Y|S|P|G|Y|C|L|T|D|L|Y|K|G|E|D|C|N|F|C|Y|V 1031  
*PbSERA3* 1074 N|H|Y|S|P|G|Y|C|L|T|L|S|G|K|N|K|C|L|F|C|Y|V 1096

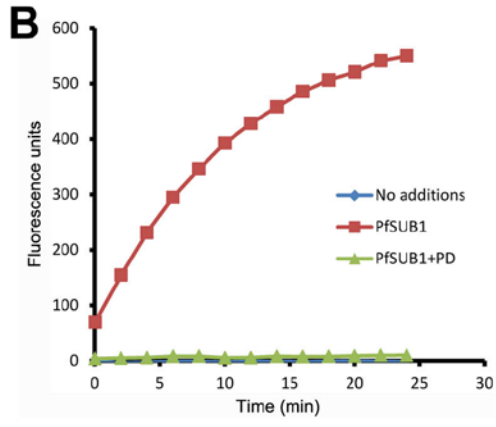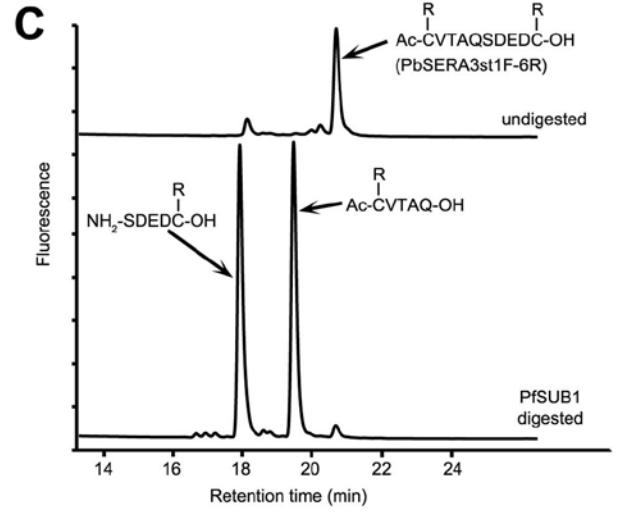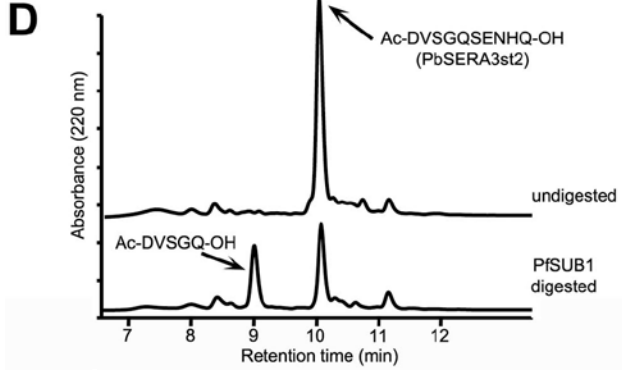

Table S1. Oligonucleotide primers used in this study

|                       |                                                                                                 |                                                                            |
|-----------------------|-------------------------------------------------------------------------------------------------|----------------------------------------------------------------------------|
| SERA6_C/A_fwd         | Forward amplification to mutate C644A in <i>sera6<sub>synth</sub></i>                           | 5'- GCAGGGAAACTGTGGTTTGGCTTGGATCTTCGCTTCCAAG -3'                           |
| SERA6_C/A_rev         | Reverse amplification to mutate C644A in <i>sera6<sub>synth</sub></i>                           | 5'- CTTGGAAGCGAAGATCCAAGCCAAACCACAGTTTCCCTGC -3'                           |
| SERA6st1_mut_fwd      | Forward amplification to mutate SERA6st1 from AQ to LL in <i>sera6<sub>synth</sub></i>          | 5'- GAAGAAAAGATGAACGAGATCAAGGTTAAGTTATTGGATGACTTCAACCCAAACGAGTACAAGTTG -3' |
| SERA6st1_mut_rev      | Reverse amplification to mutate SERA6st1 in <i>sera6<sub>synth</sub></i>                        | 5'- CTTCTTTTTCTACTTGCTCTAGTTCCAATTCATAA CCTACTGAAGTTGGGTTTGCTCATGTTCAAC-3' |
| SERA6st2_mut_fwd      | Forward amplification to mutate SERA6st2 from GQ to LL in <i>sera6<sub>synth</sub></i>          | 5'- GAACGATTACGACAACGCTTTCGTTCACTTATTATCTGATGAATCCGACGAGACTAACAAA -3'      |
| SERA6st2_mut_rev      | Reverse amplification to mutate SERA6st2 in <i>sera6<sub>synth</sub></i>                        | 5'- CTTGCTAATGCTGTTGCGAAAGCAAGTGAATAA TAGACTACTTAGGCTGCTCTGATTGTTT -3'     |
| PbSERA3_C/A_fwd       | Forward amplification to Mutate C641A in <i>pbsera3<sub>synth</sub></i>                         | 5'- GGCAACTGCTCCCTGGCCTGGCTGTTTCGCTTC -3'                                  |
| PbSERA3_C/A_rev       | Reverse amplification to mutate C641A in <i>pbsera3<sub>synth</sub></i>                         | 5'- GAAGCGAACAGCCAGCCAGCCAGGGAGCAGTTGCC -3'                                |
| SERA6prom_fwd         | Forward amplification of <i>SERA6</i> promoter for pHH-SERA6 <sub>synth</sub>                   | 5'- GAGATCTGTATCCTTTAATTTTTAAATAGGGCATAAC -3'                              |
| SERA6prom_rev         | Forward amplification of <i>SERA6</i> promoter for pHH-SERA6 <sub>synth</sub>                   | 5'- GATATCACATAATAATGGACATAACGATAATCTCGAGC -3'                             |
| SERA6synth_fwd        | Forward amplification of <i>sera6<sub>synth</sub></i> for pHH-SERA6chim                         | 5'- GCTCGAGGTTAACAAGAACGGTGTATCTCC -3'                                     |
| SERA6synth_rev        | Reverse amplification of <i>sera6<sub>synth</sub></i> for pHH-SERA6chim                         | 5'- GGTGAAGATTGTAACCTCTGTTATGTTCTCGAGC -3'                                 |
| SERA6gen_homology_fwd | Forward amplification of genomic <i>SERA6</i> (region of homology) for pHH-SERA6chim            | 5'- CAGTATACATGATATGTCCTATTTTTAGCTTTTTAGCTTT -3'                           |
| SERA6gen_homology_rev | Reverse amplification of genomic <i>SERA6</i> (region of homology) for pHH-SERA6chim            | 5'- CAAGGATTGATGTTGAGCACAAGGGTGAG -3'                                      |
| a                     | Forward primer for diagnostic PCR, designed to hybridize to the 5' UTR of the <i>SERA6</i> gene | 5'- AAAAGTAAAAGACCAAATGATA -3'                                             |
| b                     | Reverse primer for diagnostic PCR, designed to hybridize to the                                 | 5'- AAGTAGGAGTCGGACTTAGAA -3'                                              |

|                        |                                                                                                         |                                  |
|------------------------|---------------------------------------------------------------------------------------------------------|----------------------------------|
|                        | <i>sera6<sub>synth</sub></i> sequence                                                                   |                                  |
| c                      | Reverse primer for diagnostic PCR, designed to hybridize to the endogenous <i>SERA6</i> coding sequence | 5'- GATTCAGTGGTAATGTTAGACCTC -3' |
| SERA6int_probe_fw<br>d | Forward amplification of genomic <i>SERA6</i> for Southern blot probe                                   | 5'- CTGTGATATCACATAATAATGGAC -3' |
| SERA6int_probe_re<br>v | Reverse amplification of genomic <i>SERA6</i> for Southern blot probe                                   | 5'- CAGATGATGATTCAGTTGGAAG -3'   |

**Table S2.** Correct cleavage by rPfsUB1 of peptide substrates based on predicted PbSUB1 processing sites within PbSERA3.

| Peptide name   | Peptide sequence <sup>a</sup>         | Digestion product identified <sup>b</sup>     | Predicted $m/z^c$ | Measured $m/z^c$ |
|----------------|---------------------------------------|-----------------------------------------------|-------------------|------------------|
| PbSERA3st2     | Ac-DVSGQ↓SENHQ                        | Ac-DVSGQ                                      | 547.2             | 547.2            |
| PbSERA3st1F-6R | Ac-CVTAQ↓SDEDC <sup>d</sup><br> <br>R | Ac-CVTAQ <sup>d</sup><br> <br>R               | 1004.5            | 1004.6           |
|                |                                       | NH <sub>2</sub> -SDEDC <sup>d</sup><br> <br>R | 1009.4            | 1009.5           |

<sup>a</sup> See Fig. S3 and main paper for the details of predicted PbSERA3 processing sites and relevant references. Expected scissile bond is indicated by a downward-pointing arrow.

<sup>b</sup> Digestion products were fractionated by RP-HPLC (Fig. S3) and identified by electrospray mass spectrometry.

<sup>c</sup> Monoisotopic  $m/z$  values.

<sup>d</sup> PbSERA3st1F-6R is the peptide Ac-CVTAQSDEDC labelled on both cysteine side chains with 6-iodoacetamido tetramethylrhodamine, as described previously (3) (see also Fig. S3). Cysteine side chains modified by 6-iodoacetamido tetramethylrhodamine are shown (-R). The modification results in an increase in mass of each Cys residue of 441.2 Da (3).



## References

1. Waterhouse, A. M., Procter, J. B., Martin, D. M., Clamp, M., and Barton, G. J. (2009) *Bioinformatics* **25**, 1189-1191
2. Clamp, M., Cuff, J., Searle, S. M., and Barton, G. J. (2004) *Bioinformatics* **20**, 426-427
3. Blackman, M. J., Corrie, J. E., Croney, J. C., Kelly, G., Eccleston, J. F., and Jameson, D. M. (2002) *Biochemistry* **41**, 12244-12252
4. Yeoh, S., O'Donnell, R. A., Koussis, K., Dluzewski, A. R., Ansell, K. H., Osborne, S. A., Hackett, F., Withers-Martinez, C., Mitchell, G. H., Bannister, L. H., Bryans, J. S., Kettleborough, C. A., and Blackman, M. J. (2007) *Cell* **131**, 1072-1083
5. Child, M. A., Epp, C., Bujard, H., and Blackman, M. J. (2010) *Mol Microbiol* **78**, 187-202
6. Koussis, K., Withers-Martinez, C., Yeoh, S., Child, M., Hackett, F., Knuepfer, E., Juliano, L., Woehlbier, U., Bujard, H., and Blackman, M. J. (2009) *EMBO J* **28**, 725-735
